# Supplementary material
Source: PubMed Central journal article supplement (PMC4609184)
Supplement: embj0034-2522-sd2.pdf [file embj0034-2522-sd2.pdf]

## Expanded View Figures

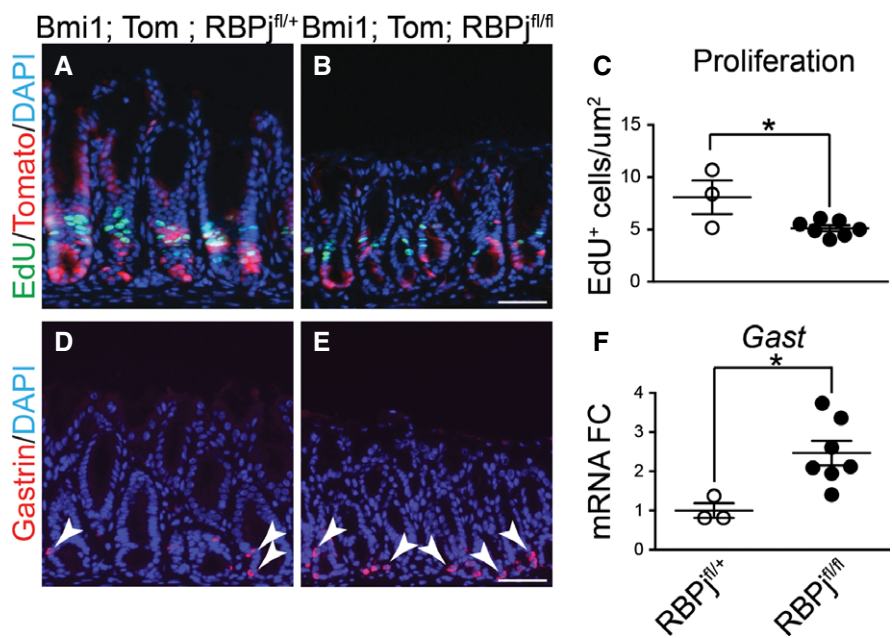

**Figure EV1. Genetic Notch inhibition decreases cell proliferation and induces endocrine cell differentiation.**

*Bmi1; ROSA<sup>Tom</sup>; RBPj<sup>fl/+</sup>* (control; *n* = 3) and *Bmi1; ROSA<sup>Tom</sup>; RBPj<sup>fl/fl</sup>* (Notch-inhibited; *n* = 7) mice were treated with 100 mg/kg TX for 5 days and stomachs collected the next day.

**A–C** Proliferation was measured in antral paraffin sections via EdU detection after incorporation for 2 h (mean ± SEM). \**P* = 0.023 versus *RBPj<sup>fl/+</sup>* using Student's *t*-test.

**D, E** Cellular differentiation was measured by immunostaining for gastrin-expressing endocrine cells. Scale bars: 50 μm.

**F** Gastrin gene expression was measured by qRT-PCR analysis of antral RNA (mean ± SEM; *n* = 3–7 mice). \**P* = 0.02 versus *RBPj<sup>fl/+</sup>* using Student's *t*-test.

Data information: Arrowheads indicate gastrin-expressing endocrine cells.

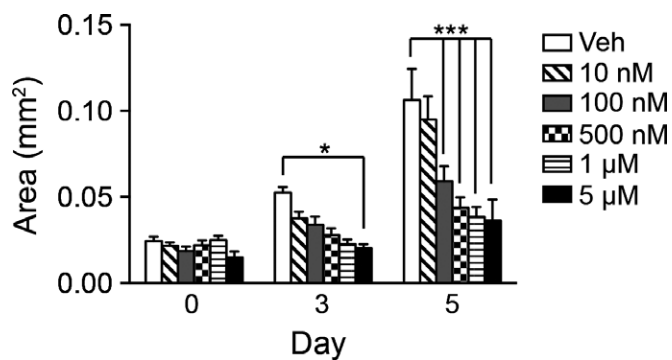

**Figure EV2. Notch regulates antral organoid growth.**

Antral organoid growth was measured in response to vehicle or increasing concentrations of DAPT (10 nM–5 μM) (mean ± SEM; *n* = 16–30 organoids per group). \**P* < 0.05, \*\*\**P* < 0.001 versus vehicle using two-way ANOVA.

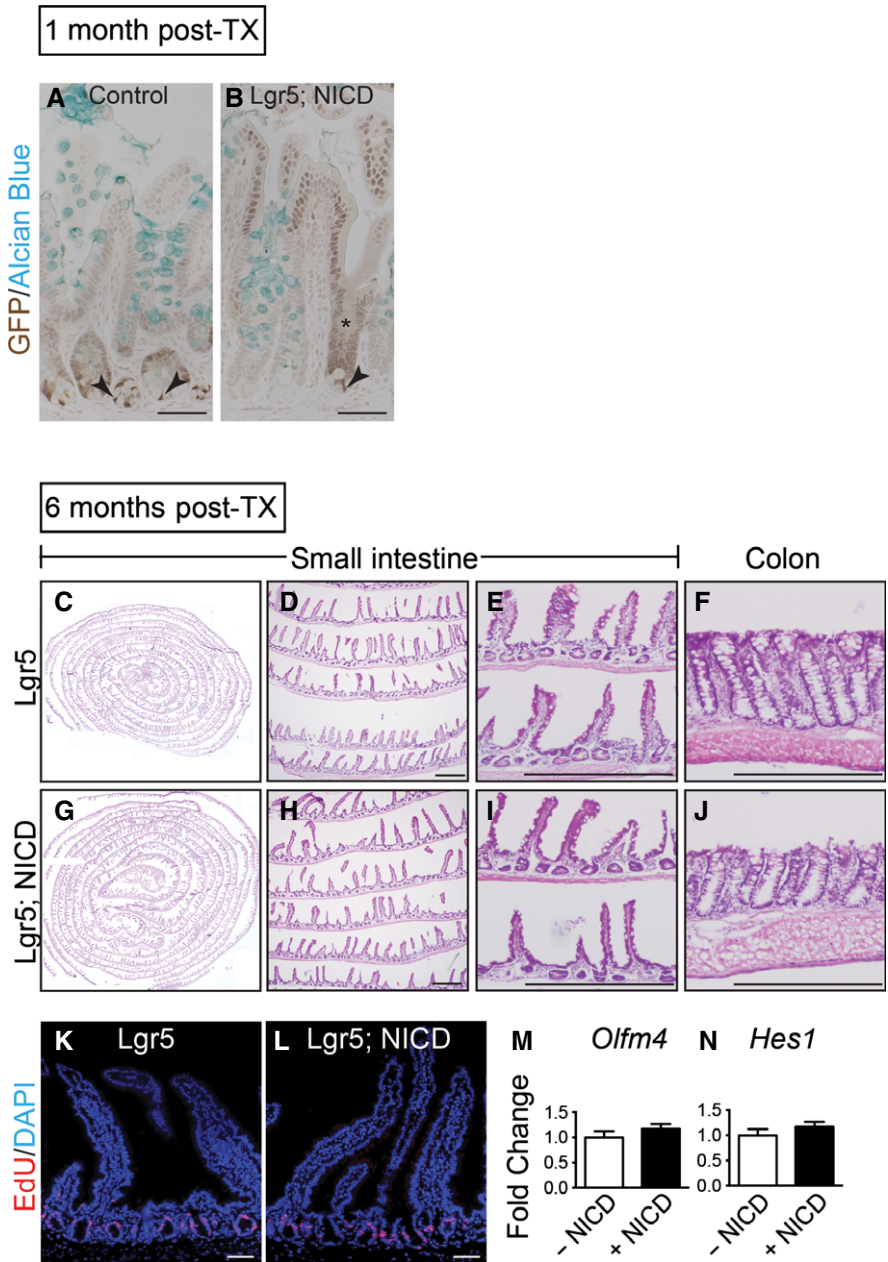

**Figure EV3. Chronic Notch activation in LGR5<sup>+</sup> stem cells does not induce intestinal polyps.**

A, B Goblet cells in NICD<sup>+</sup> ileal crypts were analyzed by co-staining for GFP (cytoplasmic, Lgr5; nuclear, NICD) and Alcian Blue in control ( $n = 3$ ) or *Lgr5*; *ROSA<sup>NICD</sup>* ( $n = 3$ ) mice 1 month post-TX. Nuclear GFP was observed in a patchy pattern consistent with the known mosaic expression pattern of *Lgr5-EGFP-IRES-CreERT2*. Recombined crypts with NICD-GFP expression (asterisk) in *Lgr5*; *ROSA<sup>NICD</sup>* mice exhibited a reduction in goblet cells, in accordance with the known effect of Notch signaling to block secretory cell differentiation. Arrowheads indicate LGR5-GFP<sup>+</sup> intestinal stem cells at the base of the crypts. Scale bars: 50  $\mu$ m.

C–J No polyps were observed in intestine 6 months after TX induction of NICD. H&E analysis of *Lgr5* control ( $n = 7$ ) (C–F) and *Lgr5*; *ROSA<sup>NICD</sup>* ( $n = 7$ ) (G–J) small intestine (C–E; G–I) and colon (F, J). Scale bars: 100  $\mu$ m.

K, L Proliferation was measured by EdU incorporation and found to be unchanged in *Lgr5*; *ROSA<sup>NICD</sup>* mice. Scale bars: 50  $\mu$ m.

M, N qRT–PCR analysis of *Olfm4* and *Hes1* in *Lgr5* and *Lgr5*; *ROSA<sup>NICD</sup>* intestine revealed no change to stem cell marker or Notch target gene expression. Data are expressed as mean  $\pm$  SEM ( $n = 7$  mice per group).

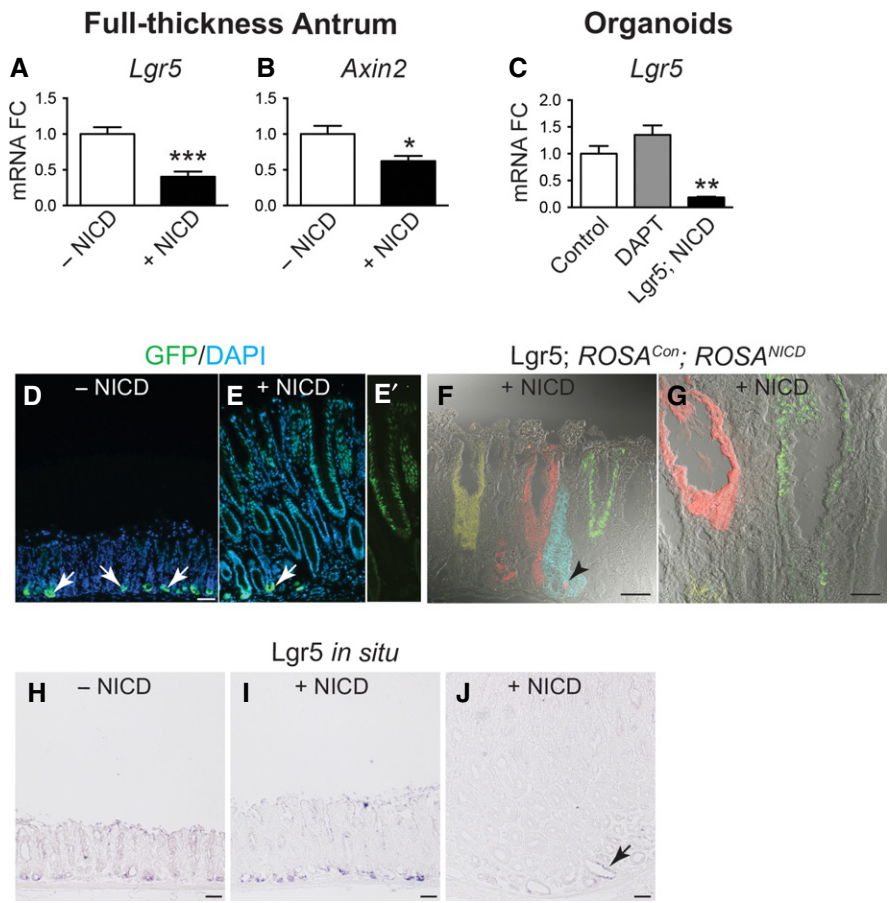

**Figure EV4. Chronic Notch activation in LGR5<sup>+</sup> stem cells decreases Wnt signaling.**

A–C qRT–PCR analysis for Wnt target genes *Lgr5* (A) and *Axin2* (B) in control ( $n = 7$ ) and *Lgr5*; *ROSA<sup>NICD</sup>* ( $n = 7$ ) mice 1 year post-TX, or *Lgr5* antral organoids ( $n = 8$  per group) (C) in control, DAPT-treated and *Lgr5*; *ROSA<sup>NICD</sup>* antral organoids ( $n = 8$  per group) (mean  $\pm$  SE). \* $P < 0.05$  and \*\*\* $P < 0.001$  vs. –NICD using Student's  $t$ -test. \*\* $P < 0.01$  vs. Control using one-way ANOVA.

D, E GFP immunostaining in control and *Lgr5*; *ROSA<sup>NICD</sup>* mice 1 year post-TX. NICD activation showed lack of cytoplasmic *Lgr5*-GFP expression in hyperplastic polyps. Arrows indicate cytoplasmic *Lgr5*-GFP<sup>+</sup> stem cells at the gland base. (E') Prominent nuclear GFP resulting from NICD activation in *Lgr5*; *ROSA<sup>NICD</sup>* antral polyp. Scale bars: 50  $\mu$ m.

F, G *Lgr5* re-tracing with the *ROSA<sup>Con</sup>* reporter in *Lgr5*; *ROSA<sup>NICD</sup>* mice. Re-tracing was observed in non-polyp tissue (F; arrowhead), but not in a polyp region (G). Scale bars: 50  $\mu$ m.

H–J *Lgr5 in situ* hybridization in control and *Lgr5*; *ROSA<sup>NICD</sup>* mice 1 year post-TX. *Lgr5* expression (J; arrow) was markedly reduced in polyp areas. Scale bars: 50  $\mu$ m.

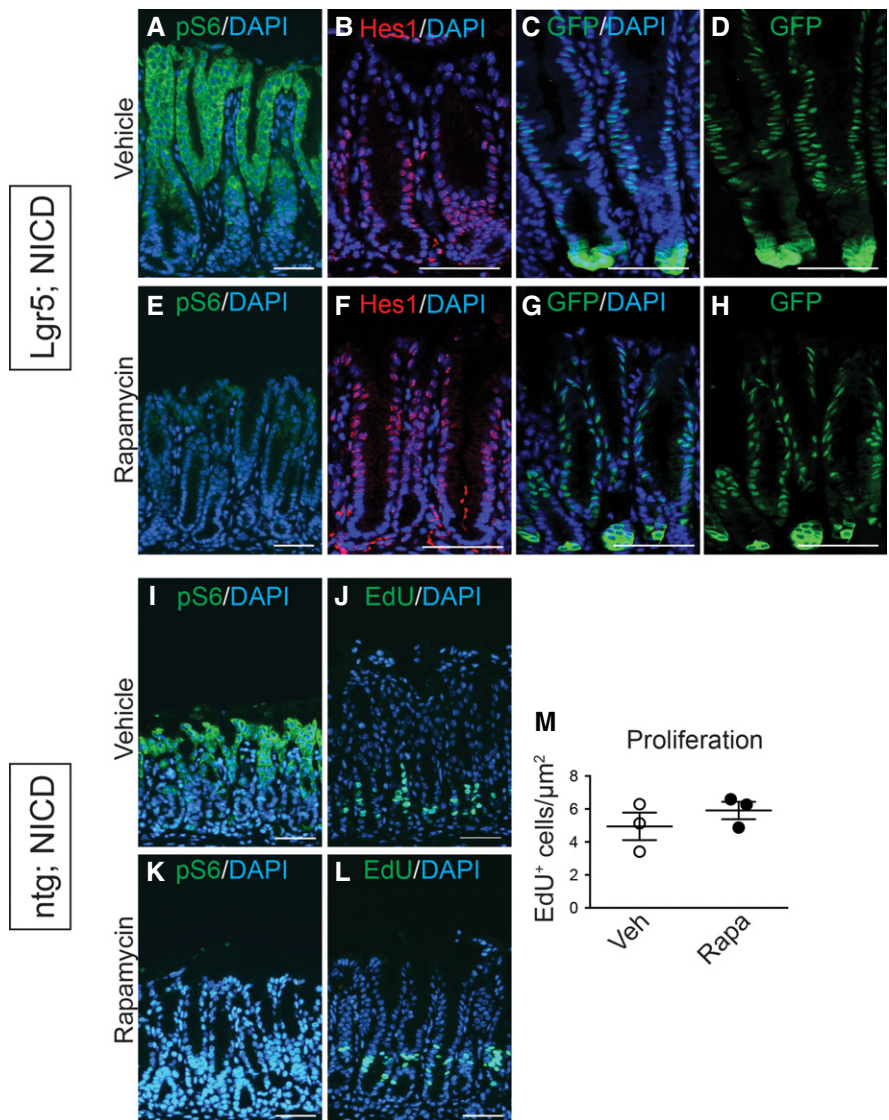

**Figure EV5. Rapamycin treatment in *Lgr5*; *ROSA<sup>NICD</sup>* and control mice.**

A–L pS6 expression in vehicle (A, I) and rapamycin-treated (E, K) *Lgr5*; *ROSA<sup>NICD</sup>* or control (*ntg*; *ROSA<sup>NICD</sup>*) mice shows effective blockade of mTORC1. Immunostaining for Hes1 (B, F) and NICD-GFP (C, D, G, H) revealed no change to Notch signaling or expression of the *ROSA<sup>NICD</sup>* transgene (nuclear GFP) during rapamycin treatment of *Lgr5*; *ROSA<sup>NICD</sup>* mice. (J, L) Cellular proliferation was measured via EdU incorporation in vehicle or rapamycin-treated control (*ntg*; *ROSA<sup>NICD</sup>*) mice, and (M) numbers of EdU<sup>+</sup> cells were quantified via morphometric analysis. Data are expressed as mean ± SEM (*n* = 4 mice per group). Scale bars: 50 μm.
